# Supplementary material for: DNA-Repair Gene Mutations Are Highly Prevalent in Circulating Tumour DNA from Multiple Myeloma Patients
Source: Cancers (Basel). 2019 Jun 29;11(7):917. doi: 10.3390/cancers11070917 (PMC6678219; doi:10.3390/cancers11070917)
Supplement: Supplementary file 1 [file cancers-11-00917-s001.xlsx]

## Sheet: OMD results n=76 (52 RR, 24 ND)
	Ndet - not detected	BM-specific	Shared	Pl-specific
Sample name according to status	BM	%	PL	%	STATUS
RR1	KRAS G12D	15	KRAS G12D	7.1	Relapsed
RR1	TP53 R273H	0.032	TP53 R273H	0.27	Relapsed
RR2	BRAF G469A	0.01	Ndet	Ndet	Relpased
RR2	BRAF V600E	0.41	BRAF V600E	0.16	Relpased
RR2	KRAS G12D	0.011	Ndet	Ndet	Relpased
RR2	KRAS G13C	0.043	Ndet	Ndet	Relpased
RR2	KRAS G13D	0.019	Ndet	Ndet	Relpased
RR2	KRAS Q61H_1	14	KRAS Q61H_1	3.4	Relpased
RR2	NRAS Q61K	0.069	NRAS Q61K	0.026	Relpased
RR2	Ndet	Ndet	KRAS Q61H_2	0.069	Relpased
RR3	NRAS Q61K	15	Ndet	Ndet	Relapsed
RR4	NRAS G13D	0.031	Ndet	Ndet	Relapsed
RR4	Ndet	Ndet	NRAS G12D	0.048	Relapsed
RR5	Ndet	Ndet	Ndet	Ndet	Relapsed
RR6	Ndet	Ndet	Ndet	Ndet	Relapsed
RR7	TP53 G245S	0.2	TPG245S	0.23	Relapsed
RR8	BRAF L597R	19	BRAF L579R	3.3	Relapsed
RR8	KRAS G13D	14	KRAS G13D	3.9	Relapsed
RR8	KRAS Q61H_1	1.8	KRAS Q61H_1	0.5	Relapsed
RR8	KRAS Q61L	12	KRAS Q61L	1	Relapsed
RR8	TP53 R249S	0.036	Ndet	Ndet	Relapsed
RR9	KRAS G13D	0.096	Ndet	Ndet	Relapsed
RR9	KRAS Q61H_1	7.3	KRAS Q61H_1	0.091	Relapsed
RR9	KRAS Q61L	0.47	KRAS Q61L	0.009	Relapsed
RR9	KRAS G12A	0.014	Ndet	Ndet	Relapsed
RR9	KRAS G13C	0.014	Ndet	Ndet	Relapsed
RR9	NRAS Q61K	0.007	Ndet	Ndet	Relapsed
RR10	KRAS Q61H_1	23	KRAS Q61H_1	2.1	Relapsed
RR10	TP53 R248Q	0.088	Ndet	Ndet	Relapsed
RR10	TP53 R248W	0.47	TP53 R248W	0.23	Relapsed
RR10	TP53 G245D	0.021	Ndet	Ndet	Relapsed
RR10	Ndet	Ndet	KRAS G12D	3.1	Relapsed
RR10	Ndet	Ndet	KRAS G13D	0.09	Relapsed
RR10	Ndet	Ndet	KRAS G12S	0.054	Relapsed
RR11	NRAS G12D	0.067	Ndet	Ndet	Relapsed
RR11	NRAS G12V	0.011	Ndet	Ndet	Relapsed
RR12	NRAS G12D	0.37	NRAS G12D	2.6	Relapsed
RR12	KRAS G12V	0.019	KRAS G12V	0.31	Relapsed
RR12	Ndet	Ndet	KRAS G12D	0.063	Relapsed
RR12	Ndet	Ndet	KRAS G12R	0.035	Relapsed
RR12	Ndet	Ndet	KRAS G12C	0.027	Relapsed
RR12	Ndet	Ndet	KRAS Q61H_1	0.034	Relapsed
RR12	Ndet	Ndet	NRAS G13D	14	Relapsed
RR12	Ndet	Ndet	NRAS Q61K	1.9	Relapsed
RR12	Ndet	Ndet	KRAS G13C	0.009	Relapsed
RR12	Ndet	Ndet	KRAS G13D	0.014	Relapsed
RR12	Ndet	Ndet	KRAS Q61H_2	0.009	Relapsed
RR12	Ndet	Ndet	NRAS Q61H_2	0.04	Relapsed
RR12	Ndet	Ndet	NRAS Q61L	0.034	Relapsed
RR13	KRAS G12A	1.5	KRAS G12A	0.13	Relapsed
RR13	KRAS G12C	0.18	KRAS G12C	0.017	Relapsed
RR13	KRAS G12V	5.5	KRAS G12V	0.58	Relapsed
RR13	KRAS G13D	0.073	Ndet	Ndet	Relapsed
RR13	KRAS Q61H_1	11	KRAS Q61H_1	0.8	Relapsed
RR13	KRAS Q61H_2	2.2	KRAS Q61H_2	0.049	Relapsed
RR13	KRAS Q61L	0.66	KRAS Q61L	0.046	Relapsed
RR13	KRAS A146T	0.069	Ndet	Ndet	Relapsed
RR13	NRAS Q61H_2	0.031	Ndet	Ndet	Relapsed
RR13	NRAS Q61K	0.25	NRAS Q61K	0.012	Relapsed
RR13	Ndet	Ndet	KRAS G12R	0.017	Relapsed
RR14	TP53 G245D	0.37	Ndet	Ndet	Relapsed
RR14	TP53 R273C	0.85	Ndet	Ndet	Relapsed
RR14	Ndet	Ndet	KRAS G12R	0.12	Relapsed
RR14	Ndet	Ndet	NRAS Q61K	0.34	Relapsed
RR15	NRAS G13R	23	NRAS G13R	0.72	Relapsed
RR15	TP53 R273H	0.14	TP53 R273H	0.25	Relapsed
RR15	Ndet	Ndet	KRAS G12A	0.056	Relapsed
RR15	Ndet	Ndet	KRAS G12V	0.053	Relapsed
RR15	Ndet	Ndet	NRAS G13D	0.056	Relapsed
RR15	Ndet	Ndet	TP53 G245D	0.014	Relapsed
RR15	Ndet	Ndet	TP53 R248W	0.3	Relapsed
RR15	Ndet	Ndet	TP53 R273C	0.022	Relapsed
RR16	Ndet	Ndet	Ndet	Ndet	Relapsed
RR17	Ndet	Ndet	Ndet	Ndet	Relapsed
RR18	NRAS Q61R	16	NRAS Q61R	0.5	Relapsed
RR18	TP53 R248W	0.063	TP53 R248W	0.11	Relapsed
RR18	TP53 R249S	0.017	TP53 R249S	0.018	Relapsed
RR19	Ndet	Ndet	Ndet	Ndet	Relapsed
RR20	Ndet	Ndet	Ndet	Ndet	Relapsed
RR21	KRAS G12S	12	KRAS G12S	1.8	Relapsed
RR21	NRAS G12D	0.031	Ndet	Ndet	Relapsed
RR21	TP53 R273H	0.042	TP53 R273H	0.059	Relapsed
RR22	KRAS G12D	7.6	KRAS G12D	0.046	Relapsed
RR22	TP53 G245S	0.019	Ndet	Ndet	Relapsed
RR23	KRAS G12C	13	KRAS G12C	2.9	Relapsed
RR23	KRAS Q61L	0.014	Ndet	Ndet	Relapsed
RR24	BRAF G469A	0.0084	Ndet	Ndet	Relapsed
RR24	BRAF L597R	0.33	Ndet	Ndet	Relapsed
RR24	BRAF V600E	0.014	Ndet	Ndet	Relapsed
RR24	KRAS G12A	0.44	Ndet	Ndet	Relapsed
RR24	KRAS G12C	1.1	Ndet	Ndet	Relapsed
RR24	KRAS G12D	0.72	KRAS G12D	0.04	Relapsed
RR24	KRAS G12V	0.1	Ndet	Ndet	Relapsed
RR24	KRAS G13D	0.1	Ndet	Ndet	Relapsed
RR24	KRAS Q61H_1	0.13	Ndet	Ndet	Relapsed
RR24	KRAS Q61L	0.012	Ndet	Ndet	Relapsed
RR24	KRAS Q61R	0.13	Ndet	Ndet	Relapsed
RR24	KRAS A146T	0.0017	Ndet	Ndet	Relapsed
RR24	KRAS A146V	0.21	Ndet	Ndet	Relapsed
RR24	NRAS G13R	0.017	Ndet	Ndet	Relapsed
RR24	NRAS Q61K	4.5	NRAS Q61K	0.03	Relapsed
RR24	NRAS Q61L	0.34	Ndet	Ndet	Relapsed
RR24	NRAS Q61R	5.5	NRAS Q61R	0.092	Relapsed
RR25	KRAS G12R	0.099	Ndet	Ndet	Relapsed
RR25	NRAS G13D	0.043	Ndet	Ndet	Relapsed
RR26	NRAS Q61H_2	0.015	Ndet	Ndet	Relapsed
RR27	Ndet	Ndet	Ndet	Ndet	Relapsed
RR28	Ndet	Ndet	KRAS G12R	0.096	Relapsed
RR29	NRAS Q61R	44	NRAS Q61R	19	Relapsed
RR29	PIK3CA E542K	0.35	PIK3CA E542K	0.28	Relapsed
RR29	PIK3CA E545K	3	PIK3CA E545K	0.59	Relapsed
RR29	Ndet	Ndet	PIK3CA H1047R	0.024	Relapsed
RR29	Ndet	Ndet	PIK3CA C420R	0.015	Relapsed
RR30	Ndet	Ndet	Ndet	Ndet	Relapsed
RR31	Ndet	Ndet	Ndet	Ndet	Relapsed
RR32	KRAS G13D	1.4	Ndet	Ndet	Relapsed
RR33	Ndet	Ndet	Ndet	Ndet	Relapsed
RR34	Ndet	Ndet	PIK3CA E542K	0.82	Relapsed
RR34	Ndet	Ndet	PIK3CA E81K	0.14	Relapsed
RR35	Ndet	Ndet	BRAF G469A	0.019	Relapsed
RR35	Ndet	Ndet	KRAS G12A	0.013	Relapsed
RR35	Ndet	Ndet	NRAS G12S	0.01	Relapsed
RR35	Ndet	Ndet	NRAS Q61K	0.0061	Relapsed
RR36	BRAF V600E	0.031	Ndet	Ndet	Relapsed
RR36	KRAS G12C	0.008	Ndet	Ndet	Relapsed
RR36	KRAS G12D	0.043	Ndet	Ndet	Relapsed
RR36	KRAS G12V	0.009	Ndet	Ndet	Relapsed
RR36	KRAS G13D	0.045	Ndet	Ndet	Relapsed
RR36	KRAS Q61H_1	28	Ndet	Ndet	Relapsed
RR36	KRAS Q61H_2	0.72	Ndet	Ndet	Relapsed
RR36	KRAS Q61R	1	Ndet	Ndet	Relapsed
RR36	NRAS Q61H_2	24	Ndet	Ndet	Relapsed
RR36	NRAS Q61K	0.18	Ndet	Ndet	Relapsed
RR36	NRAS Q61R	0.068	Ndet	Ndet	Relapsed
RR37	KRAS G12S	0.19	Ndet	Ndet	Relapsed
RR38	KRAS Q61H_2	35	KRAS Q61H_2	30	Relapsed
RR39	NRAS Q61K	8	Ndet	Ndet	Relapsed
RR40	Ndet	Ndet	TP53 R273H	0.13	Relapsed
RR41	KRAS G12V	23	KRAS G12V	14	Relapsed
RR42	KRAS Q61H_1	0.21	Ndet	Ndet	Relapsed
RR42	TP53 R273C	4.3	TP53 R273C	14	Relapsed
RR42	Ndet	Ndet	TP53 R175H	11	Relapsed
RR42	Ndet	Ndet	TP53 R248W	0.048	Relapsed
RR43	BRAF V600E	6.2	BRAF V600E	29	Relapsed
RR43	TP53 R248W	13	TP53 R248W	0.49	Relapsed
RR43	Ndet	Ndet	TP53 G245D	0.44	Relapsed
RR43	Ndet	Ndet	TP53 R248Q	1.9	Relapsed
RR44	Ndet	Ndet	BRAF V600E	3.3	Relapsed
RR45	KRAS Q61H_1	0.11	KRAS Q61H_1	0.14	Relapsed
RR46	Ndet	Ndet	TP53 R249S	0.17	Relapsed
RR47	Ndet	Ndet	Ndet	Ndet	Relapsed
RR48	KRAS Q61R	30	KRAS Q61R	21	Relapsed
RR48	Ndet	Ndet	NRAS G13R	0.04	Relapsed
RR48	Ndet	Ndet	NRAS Q61R	6.5	Relapsed
RR48	Ndet	Ndet	TP53 R273H	0.39	relapsed
RR49	Ndet	Ndet	KRAS Q61H_1	20	Relapsed
RR49	Ndet	Ndet	TP53 R175H	7.3	Relapsed
RR49	Ndet	Ndet	TP53 R248W	0.038	Relapsed
RR49	Ndet	Ndet	TP53 R282W	0.26	Relapsed
RR50	Ndet	Ndet	BRAF V600E	4.7	Relapsed
RR51	Ndet	Ndet	Ndet	Ndet	Relapsed
RR52	NRAS Q61K	0.0097	Ndet	Ndet	New Diagnosis
ND1	KRAS Q61H_1	32	KRAS Q61H_1	0.45	New Diagnosis
ND2	NRAS G12S	0.037	Ndet	Ndet	New Diagnosis
ND2	NRAS G12V	0.22	NRAS G12V	0.18	New Diagnosis
ND3	Ndet	Ndet	KRAS G13C	0.016	New Diagnosis
ND4	KRAS G12A	0.097	Ndet	Ndet	New Diagnosis
ND5	BRAF V600E	1.6	BRAF V600E	0.26	New Diagnosis
ND6	Ndet	Ndet	Ndet	Ndet	New Diagnosis
ND7	NRAS G13R	0.059	Ndet	Ndet	New Diagnosis
ND8	KRAS A146V	0.034	Ndet	Ndet	New Diagnosis
ND8	NRAS G12D	0.0089	Ndet	Ndet	New Diagnosis
ND8	NRAS Q61K	0.0059	Ndet	Ndet	New Diagnosis
ND10	KRAS G12D	7.8	Ndet	Ndet	New Diagnosis
ND11	Ndet	Ndet	Ndet	Ndet	New Diagnosis
ND12	KRAS Q61H_1	9.5	Ndet	Ndet	New Diagnosis
ND12	NRAS Q61K	0.019	Ndet	Ndet	New Diagnosis
ND13	BRAF K601E	0.09	Ndet	Ndet	New Diagnosis
ND13	KRAS G12D	0.086	Ndet	Ndet	New Diagnosis
ND13	KRAS Q61R	0.31	Ndet	Ndet	New Diagnosis
ND13	NRAS G13R	0.015	Ndet	Ndet	New Diagnosis
ND13	NRAS Q61L	0.95	Ndet	Ndet	New Diagnosis
ND13	NRAS Q61R	0.17	Ndet	Ndet	New Diagnosis
ND14	BRAF V600E	0.039	Ndet	Ndet	New Diagnosis
ND15	KRAS G12A	0.016	Ndet	Ndet	New Diagnosis
ND16	BRAF V600E	0.97	Ndet	Ndet	New Diagnosis
ND16	GNAS R201H	0.44	GNAS R201H	0.46	New Diagnosis
ND16	KRAS G12D	0.037	Ndet	Ndet	New Diagnosis
ND16	KRAS Q61H_1	0.098	Ndet	Ndet	New Diagnosis
ND17	Ndet	Ndet	GNAS R201C	0.071	New Diagnosis
ND18	KRAS Q61H_1	46	KRAS Q61H_1	7.5	New Diagnosis
ND19	NRAS Q61R	4.3	NRAS Q61R	0.43	New Diagnosis
ND20	KRAS G12D	0.042	Ndet	Ndet	New Diagnosis
ND21	Ndet	Ndet	BRAF G469A	0.72	New Diagnosis
ND21	Ndet	Ndet	NRAS G12D	0.99	New Diagnosis
ND22	KRAS G12S	0.015	Ndet	Ndet	New Diagnosis
ND22	KRAS Q61R	0.49	Ndet	Ndet	New Diagnosis
ND22	TP53 R273H	0.56	Ndet	Ndet	New Diagnosis
ND23	Ndet	Ndet	Ndet	Ndet	New Diagnosis
ND24	BRAF G469A	0.079	Ndet	Ndet	New Diagnosis
ND24	BRAF V600E	0.2	Ndet	Ndet	New Diagnosis
ND24	KRAS G12A	0.097	Ndet	Ndet	New Diagnosis
ND24	KRAS G13C	0.8	Ndet	Ndet	New Diagnosis
ND25	Ndet	Ndet	Ndet	Ndet	New Diagnosis

## Sheet: TAS results n=36 (31 RR, 5 ND)
Filter settings
Confidence - Keep
Call quality is atleast 20; variants pass upstream filtering; more than 10 read depth; outside top 5% in 100base healthy public; outside top 1% in 1000Genome
Common variants - exclude
Occur at 3% allele frequency in "gnomAD, CGI, 1000 Genome, ExAC, NHBLI ESP exomes
Genetic analysis
Recommended settings for tumour specific variants - Pair/match samples from same individual - keep all case (PL and BM) and remove all control (normal)
Cancer driver variants - Keep
Recommended settings
Predicted deleterious
Recommended settings
Plasma	Bone marrow	Peripheral Blood
Patient 1	New diagnosis
Chromosome	Position	Reference Allele	Sample Allele	Variation Type	Gene Region	Gene Symbol	Protein Variant	Case Samples With Variant	Control Samples With Variant	Q2_S2 - Allele Fraction	2-BM_S16 - Allele Fraction	2-PB_S1 - Allele Fraction	Sample Upstream Filtering	Translation Impact	SIFT Function Prediction	PolyPhen-2 Function Prediction	dbSNP ID	CLINVAR ID	COSMIC ID
17	45232036	A	G	SNV	Splice Site	CDC27		1	0	1.09			Pass; -; -
12	25378561	G	A	SNV	Exonic	KRAS	p.A146V	2	0	0.91	47.11		Pass; Pass; -	missense	Damaging	Possibly Damaging	1057519725	RCV000441300.1; RCV000434735.1; RCV000423608.1	30613; 1360827; 19900
Patient 2	Relapsed
Chromosome	Position	Reference Allele	Sample Allele	Variation Type	Gene Region	Gene Symbol	Protein Variant	Case Samples With Variant	Control Samples With Variant	Q5_S5 - Allele Fraction	5-BM_S17 - Allele Fraction	5-PB_S4 - Allele Fraction	Sample Upstream Filtering	Translation Impact	SIFT Function Prediction	PolyPhen-2 Function Prediction	dbSNP ID	CLINVAR ID	COSMIC ID
11	108124594	T	C	SNV	Exonic	ATM	p.L651P	1	0		3.64		-; Pass; -	missense	Damaging	Probably Damaging
11	108155072	A	G	SNV	Exonic	ATM	p.K1289E	1	0		2.66		-; Pass; -	missense	Damaging	Possibly Damaging
3	142177910	A	G	SNV	Exonic	ATR	p.S2465P	1	0		2.44		-; Pass; -	missense	Damaging	Probably Damaging
3	142285046	T	C	SNV	Exonic	ATR	p.D70G	1	0		3.14		-; Pass; -	missense	Damaging	Probably Damaging
11	108224538	T	C	SNV	Intronic; Exonic	C11orf65; ATM	p.V2906A	1	0				-; Pass; -	missense	Damaging	Probably Damaging	730881328	RCV000159664.2
17	45221247	A	G	SNV	Splice Site	CDC27		1	0		4.72		-; Pass; -						69321; 4947634
16	50813851	G	A	SNV	Exonic	CYLD	p.V469M; p.V472M	1	0		0.98		-; Pass; -	missense	Damaging	Possibly Damaging
13	73352418	T		Deletion	Exonic	DIS3	p.M1fs*12; p.M133fs*12; p.M40fs*12; p.M163fs*12	1	0	0.44			Pass; -; -	frameshift					4613354
13	73355145	A	G	SNV	Promoter; Intronic	DIS3; PIBF1		1	0		3.93		-; Pass; -
1	118166255	C	G	SNV	Exonic	FAM46C	p.F255L	1	0		6.38		-; Pass; -	missense	Damaging	Probably Damaging
20	57415166	A	G	SNV	Promoter; Exonic	GNAS	p.D2G	1	0		1.34		-; Pass; -	missense		Probably Damaging
20	57429226	G	A	SNV	Exonic; Intronic	GNAS	p.M302I; p.W240*	1	0		1.56		-; Pass; -	missense; stop gain		Benign
6	405066	T	C	SNV	ncRNA; Exonic	IRF4	p.V382A; p.V383A	1	0	0.32			Pass; -; -	missense	Damaging	Possibly Damaging
12	25398215	G	A	SNV	Exonic	KRAS	p.T35I	1	0		2.91		-; Pass; -	missense	Damaging	Possibly Damaging			14208
1	115252281	A	G	SNV	Exonic	NRAS	p.L120S	1	0		1.62		-; Pass; -	missense	Damaging	Possibly Damaging
1	115258747	C	T	SNV	Exonic	NRAS	p.G12D	1	0		9.35		-; Pass; -	missense	Damaging	Benign	121913237	RCV000440963.1; RCV000144963.3; RCV000434517.1; RCV000158980.2; RCV000430706.1; RCV000032849.7; RCV000424239.1; RCV000436228.1; RCV000439064.1; RCV000417702.1; RCV000427949.1; RCV000417869.1	46495; 564
6	106547347	A	G	SNV	Exonic	PRDM1	p.E195G; p.E61G	1	0	0.28			Pass; -; -	missense	Damaging	Probably Damaging
6	106554325	T	C	SNV	Exonic	PRDM1	p.L618P; p.L484P	1	0		2.78		-; Pass; -	missense	Damaging	Probably Damaging
17	7574030	G	A	SNV	Exonic; 3'UTR	TP53	p.R333C; p.R294C; p.R174C; p.R201C	1	0		1.96		-; Pass; -	missense	Damaging	Probably Damaging	769934890	RCV000164055.2; RCV000197833.2; RCV000485066.1	4384912; 4384911
14	103371745	C	T	SNV	Exonic	TRAF3	p.P361L; p.P444L; p.P419L	1	0		4.21		-; Pass; -	missense	Damaging	Probably Damaging
Patient 3	Relapsed
Chromosome	Position	Reference Allele	Sample Allele	Variation Type	Gene Region	Gene Symbol	Protein Variant	Case Samples With Variant	Control Samples With Variant	Q8_S8 - Allele Fraction	8-BM_S18 - Allele Fraction	8-PB_S7 - Allele Fraction	Sample Upstream Filtering	Translation Impact	SIFT Function Prediction	PolyPhen-2 Function Prediction	dbSNP ID	CLINVAR ID	COSMIC ID
17	79477790	A	G	SNV	ncRNA; Exonic	ACTG1	p.F352L	1	0		1.16		-; Pass; -	missense	Damaging	Probably Damaging
17	79477953	C	T	SNV	ncRNA; Exonic	ACTG1	p.K328K	1	0		1.37		-; Pass; -	synonymous
11	108121532	G	A	SNV	Exonic	ATM	p.R447Q	1	0		1.82		-; Pass; -	missense	Damaging	Possibly Damaging	760676955	RCV000219262.1
3	142180923	T	C	SNV	Exonic	ATR	p.K2351E	1	0		1.87		-; Pass; -	missense	Damaging	Probably Damaging
3	142253975	C	T	SNV	Exonic	ATR	p.D1298N	1	0		1.17		-; Pass; -	missense	Damaging	Probably Damaging			3588271
3	142254996	T	C	SNV	Exonic	ATR	p.H1258R	1	0		1.39		-; Pass; -	missense	Damaging	Possibly Damaging
7	140477807	C	T	SNV	Exonic	BRAF	p.E501K	2	0	3.76	10.08		Pass; Pass; -	missense	Damaging	Probably Damaging	180177038	RCV000033315.3; RCV000292151.1; RCV000207513.1; RCV000015011.31	5417703
11	108180978	T	C	SNV	Intronic; Exonic	C11orf65; ATM	p.F1952L	1	0		1.34		-; Pass; -	missense	Damaging	Probably Damaging
11	108198435	G	A	SNV	Intronic; Exonic	C11orf65; ATM	p.E2347K	1	0		0.83		-; Pass; -	missense	Damaging	Probably Damaging			6452955; 6452954
11	69457953	C	T	SNV	Exonic	CCND1	p.P118L	1	0		0.57		-; Pass; -	missense	Damaging	Probably Damaging
16	50785711	C	A	SNV	Exonic	CYLD	p.S234Y	1	0		2.35		-; Pass; -	missense	Damaging	Probably Damaging
16	50811799	C	T	SNV	Exonic	CYLD	p.S359F; p.S362F	1	0		1.35		-; Pass; -	missense	Damaging	Probably Damaging
16	50813906	G	A	SNV	Exonic	CYLD	p.W487*; p.W490*	1	0		0.88		-; Pass; -	stop gain
16	50828288	G	A	SNV	Exonic	CYLD	p.G879R; p.G876R	1	0		1.13		-; Pass; -	missense	Damaging	Probably Damaging
13	73337734	G	A	SNV	Exonic	DIS3	p.S661F; p.S538F; p.S631F; p.S499F	1	0		3.16		-; Pass; -	missense	Damaging	Probably Damaging
4	1803351	G	A	SNV	Exonic	FGFR3	p.R207Q	1	0		1.14		-; Pass; -	missense	Damaging	Probably Damaging
4	1807161	C	T	SNV	Exonic	FGFR3	p.R498W; p.R386W; p.R500W	1	0		0.83		-; Pass; -	missense	Damaging	Possibly Damaging	773735098		4467592; 4467593
4	1808030	G	A	SNV	Exonic	FGFR3	p.R671Q; p.R669Q; p.R557Q	1	0		1.71		-; Pass; -	missense	Damaging	Benign	773089715		1428733; 1428734
20	57428644	G	A	SNV	Exonic; Intronic	GNAS	p.S46N; p.Q108Q	1	0		0.68		-; Pass; -	missense; synonymous
20	57429796	A	G	SNV	Exonic; Intronic	GNAS	p.P492P; p.Q430R	1	0		1.3		-; Pass; -	missense; synonymous
20	57430201	G	A	SNV	Exonic; Intronic	GNAS	p.S565N; p.Q627Q	1	0		1.17		-; Pass; -	missense; synonymous
6	26157235	C	T	SNV	Promoter; Exonic	HIST1H1E; HIST1H2BD	p.P206L	1	0		0.52		-; Pass; -	missense	Damaging	Probably Damaging
6	398826	A	G	SNV	Splice Site	IRF4		1	0		1.09		-; Pass; -
3	178927993	G	A	SNV	Exonic	PIK3CA	p.W424*	1	0		1.45		-; Pass; -	stop gain
3	178928109	G	A	SNV	Exonic	PIK3CA	p.G463R	1	0		1.79		-; Pass; -	missense	Activating	Probably Damaging			5347097
3	178947859	G	A	SNV	Exonic	PIK3CA	p.G912R	1	0		1.08		-; Pass; -	missense	Damaging	Probably Damaging
17	7577096	T	C	SNV	Exonic	TP53	p.D122G; p.D242G; p.D149G; p.D281G	1	0		1.46		-; Pass; -	missense	Damaging	Probably Damaging	587781525	RCV000423959.1; RCV000442068.1; RCV000436592.1; RCV000129516.2; RCV000429146.1; RCV000435472.1; RCV000442813.1; RCV000438583.1; RCV000433596.1; RCV000441016.1; RCV000431187.1; RCV000423760.1; RCV000426980.1; RCV000418257.1; RCV000418481.1; RCV000434395.1; RCV000428043.1; RCV000436807.1; RCV000425885.1	11232; 1640825; 1640824; 4271754; 1169526
Patient 4	New diagnosis
Chromosome	Position	Reference Allele	Sample Allele	Variation Type	Gene Region	Gene Symbol	Protein Variant	Case Samples With Variant	Control Samples With Variant	Q9_S9 - Allele Fraction	9-BM_S19 - Allele Fraction	9-PB_S8 - Allele Fraction	Sample Upstream Filtering	Translation Impact	SIFT Function Prediction	PolyPhen-2 Function Prediction	dbSNP ID	CLINVAR ID	COSMIC ID
17	45214623	G	A	SNV	Exonic	CDC27	p.A542V; p.A609V; p.A603V; p.A602V	1	0	0.86			Pass; -; -	missense	Damaging	Probably Damaging	75637741
20	57429036	C	T	SNV	Exonic; Intronic	GNAS	p.P239L; p.P177S	1	0		6.1		-; Pass; -	missense		Possibly Damaging
6	106553280		C	Insertion	Exonic	PRDM1	p.Y418fs*6; p.Y284fs*6	1	0	0.55			Pass; -; -	frameshift			961279924
6	106554784	A	G	SNV	Splice Site	PRDM1		1	0	1.55			Pass; -; -
Patient 5	New diagnosis
Chromosome	Position	Reference Allele	Sample Allele	Variation Type	Gene Region	Gene Symbol	Protein Variant	Case Samples With Variant	Control Samples With Variant	Q12_S12 - Allele Fraction	12-BM_S20 - Allele Fraction	12-PB_S11 - Allele Fraction	Sample Upstream Filtering	Translation Impact	SIFT Function Prediction	PolyPhen-2 Function Prediction	dbSNP ID	CLINVAR ID	COSMIC ID
17	79479078	C	T	SNV	ncRNA; Exonic	ACTG1	p.E72K	1	0		0.36		-; Pass; -	missense	Damaging	Probably Damaging
11	108173665	A	G	SNV	Exonic	ATM	p.H1802R	1	0		0.28		-; Pass; -	missense	Damaging	Probably Damaging	878853521	RCV000228710.1
16	50783749	G	A	SNV	Exonic	CYLD	p.G47E	1	0		0.4		-; Pass; -	missense		Probably Damaging
13	73352418	T		Deletion	Exonic	DIS3	p.M1fs*12; p.M133fs*12; p.M40fs*12; p.M163fs*12	1	0		0.79		-; Pass; -	frameshift					4613354
4	1808927	T	C	SNV	Exonic	FGFR3	p.S789P; p.S675P; p.S787P	1	0		0.42		-; Pass; -	missense	Damaging	Probably Damaging
20	57428908	A	G	SNV	Exonic; Intronic	GNAS	p.E134G; p.G196G	1	0	1			Pass; -; -	missense; synonymous
12	25380275	T	G	SNV	Exonic	KRAS	p.Q61H	2	0	4.15	47.89		Pass; Pass; -	missense	Damaging	Benign	17851045	RCV000154530.3; RCV000444370.1; RCV000424748.1	14201; 554; 1135364
3	178951998	A	G	SNV	Exonic	PIK3CA	p.D1018G	1	0		0.82		-; Pass; -	missense	Damaging	Probably Damaging
3	178952057	T	C	SNV	Exonic	PIK3CA	p.Y1038H	1	0		0.52		-; Pass; -	missense	Tolerated	Possibly Damaging
6	106553744	A	G	SNV	Exonic	PRDM1	p.N436S; p.N570S	1	0	0.59			Pass; -; -	missense	Damaging	Probably Damaging
17	7572946	T	C	SNV	Exonic; 3'UTR	TP53	p.E229G; p.E349G; p.E388G; p.E256G	1	0		0.31		-; Pass; -	missense	Damaging	Possibly Damaging
Patient 6	Relapsed
Chromosome	Position	Reference Allele	Sample Allele	Variation Type	Gene Region	Gene Symbol	Protein Variant	Case Samples With Variant	Control Samples With Variant	Q14_S14 - Allele Fraction	14-BM_S21 - Allele Fraction	14-PB_S13 - Allele Fraction	Sample Upstream Filtering	Translation Impact	SIFT Function Prediction	PolyPhen-2 Function Prediction	dbSNP ID	CLINVAR ID	COSMIC ID
17	79479332	A	G	SNV	ncRNA; Exonic	ACTG1	p.C17R	1	0		0.3		-; Pass; -	missense	Damaging	Probably Damaging
17	45199908	T	C	SNV	Exonic	CDC27	p.D764G; p.D704G; p.D771G; p.D765G	1	0	0.3			Pass; -; -	missense	Damaging	Probably Damaging
3	178928318	C	T	SNV	Exonic	PIK3CA	p.R502*	1	0	0.28			Pass; -; -	stop gain
14	103372093	T	A	SNV	Exonic	TRAF3	p.V477E; p.V560E; p.V535E	1	0		0.7		-; Pass; -	missense	Damaging	Probably Damaging
Patient 7	Relapsed
Chromosome	Position	Reference Allele	Sample Allele	Variation Type	Gene Region	Gene Symbol	Protein Variant	Case Samples With Variant	Control Samples With Variant	Q15_S15 - Allele Fraction	15-BM_S22 - Allele Fraction	15-PB_S14 - Allele Fraction	Sample Upstream Filtering	Translation Impact	SIFT Function Prediction	PolyPhen-2 Function Prediction	dbSNP ID	CLINVAR ID	COSMIC ID
13	73350175	A	G	SNV	Exonic	DIS3	p.L207P; p.L114P; p.L75P; p.L237P	1	0	1.13			Pass; -; -	missense	Damaging	Probably Damaging
1	115256529	T	C	SNV	Exonic	NRAS	p.Q61R	2	0	25.97	32.18		Pass; Pass; -	missense	Damaging	Benign	11554290	RCV000014914.8; RCV000424960.1; RCV000440367.1; RCV000424721.1; RCV000438052.1; RCV000432961.1; RCV000419710.1; RCV000422078.1; RCV000424455.1; RCV000431883.1; RCV000430593.1; RCV000413804.1; RCV000148032.4; RCV000430407.1; RCV000435687.1; RCV000422278.1; RCV000114744.7; RCV000439264.1; RCV000441317.1; RCV000032847.8; RCV000445249.1; RCV000420832.1; RCV000114745.7; RCV000037574.3	28048; 584
3	178936091	G	A	SNV	Exonic	PIK3CA	p.E545K	2	0	0.7	2.32		Pass; Pass; -	missense	Tolerated	Probably Damaging	104886003	RCV000442569.1; RCV000038671.9; RCV000432636.1; RCV000440053.1; RCV000427202.1; RCV000433976.1; RCV000423327.1; RCV000426520.1; RCV000440694.1; RCV000055930.6; RCV000438445.1; RCV000425490.1; RCV000438060.1; RCV000417835.1; RCV000421958.1; RCV000429391.1; RCV000014633.5; RCV000014632.5; RCV000441949.1; RCV000428639.1; RCV000014634.5; RCV000433152.1; RCV000438587.1; RCV000014631.5; RCV000014636.5;…	29328; 763; 125370
6	106553792	A	T	SNV	Exonic	PRDM1	p.Q452L; p.Q586L	2	0	45.15	94.11		Pass; Pass; -	missense	Damaging	Probably Damaging
Patient 8	New diagnosis			New diagnosis
Chromosome	Position	Reference Allele	Sample Allele	Variation Type	Gene Region	Gene Symbol	Protein Variant	Case Samples With Variant	Control Samples With Variant	Q16_S16 - Allele Fraction	16-BM_S23 - Allele Fraction	16-PB_S15 - Allele Fraction	Sample Upstream Filtering	Translation Impact	SIFT Function Prediction	PolyPhen-2 Function Prediction	dbSNP ID	CLINVAR ID	COSMIC ID
11	108115670		C	Insertion	Exonic	ATM	p.S274fs*8	1	0	0.44			Pass; -; -	frameshift
11	108115684	G		Deletion	Exonic	ATM	p.V278fs*42	1	0	0.45			Pass; -; -	frameshift
11	108143456	C	G	SNV	Exonic	ATM	p.P1054R	1	0	3.36			Pass; -; -	missense	Damaging	Probably Damaging	1800057	RCV000130988.3; RCV000120131.3; RCV000119124.3	4172507; 21827
16	50825506	C	T	SNV	Exonic	CYLD	p.Q713*; p.Q716*	1	0		0.4		-; Pass; -	stop gain
20	57485016		G	Insertion	Exonic; 3'UTR	GNAS	p.T284fs*16; p.T225fs*16; p.T270fs*16; p.T269fs*16; p.T285fs*16; p.T927fs*16	1	0	0.91			Pass; -; -	frameshift
1	115256528	T	G	SNV	Exonic	NRAS	p.Q61H	2	0	1.13	4.79		Pass; Pass; -	missense	Damaging	Benign	121913255	RCV000436751.1; RCV000443672.1; RCV000426637.1	586; 17611
3	178943794	G	A	SNV	Exonic	PIK3CA	p.E821K	1	0		3.25		-; Pass; -	missense	Damaging	Possibly Damaging
3	142168348	C	T	SNV	Promoter; Exonic	XRN1; ATR	p.V2620M	1	0		0.55		-; Pass; -	missense	Damaging	Probably Damaging	781420658
Patient 9	Relapsed
Chromosome	Position	Reference Allele	Sample Allele	Variation Type	Gene Region	Gene Symbol	Protein Variant	Case Samples With Variant	Control Samples With Variant	Q17_S17 - Allele Fraction	17-BM_S16 - Allele Fraction	17-PB_S2 - Allele Fraction	Sample Upstream Filtering	Translation Impact	SIFT Function Prediction	PolyPhen-2 Function Prediction	dbSNP ID	CLINVAR ID	COSMIC ID
17	79477840	C	T	SNV	ncRNA; Exonic	ACTG1	p.R335H	1	0	0.35			Pass; -; -	missense	Damaging	Benign
17	79479301	G	A	SNV	ncRNA; Exonic	ACTG1	p.P27L	1	0	0.44			Pass; -; -	missense	Damaging	Probably Damaging
3	142212101	A	G	SNV	Exonic	ATR	p.F1984S	1	0	0.53			Pass; -; -	missense	Damaging	Possibly Damaging
3	142272176	A	T	SNV	Exonic	ATR	p.S900T	1	0		3.94		-; Pass; -	missense	Damaging	Possibly Damaging
3	142279226	G	A	SNV	Exonic	ATR	p.Q474*	1	0		5.41		-; Pass; -	stop gain					5987729
3	142281117	C	T	SNV	Exonic	ATR	p.C376Y	1	0		5.56		-; Pass; -	missense	Damaging	Probably Damaging	200947706
3	142286962	T	C	SNV	Exonic	ATR	p.K32E	1	0	0.63			Pass; -; -	missense		Probably Damaging
7	140453152	A	G	SNV	Exonic	BRAF	p.F595L	1	0	0.54			Pass; -; -	missense	Damaging	Probably Damaging	794729219	RCV000427091.1; RCV000184039.1; RCV000414439.1	6196705; 21612
7	140507824	C	T	SNV	Exonic	BRAF	p.W216*	1	0		3.54		-; Pass; -	stop gain
11	108186768	G	A	SNV	Intronic; Exonic	C11orf65; ATM	p.W2042*	1	0	0.65			Pass; -; -	stop gain					3733251; 3733250
11	108188181	G	A	SNV	Intronic; Exonic	C11orf65; ATM	p.E2094K	1	0	0.38			Pass; -; -	missense	Damaging	Possibly Damaging			1297609; 1297608
11	108214040	C	T	SNV	Intronic; Exonic	C11orf65; ATM	p.A2787V	1	0	0.36			Pass; -; -	missense	Damaging	Probably Damaging	879253877	RCV000236706.1; RCV000475993.1
11	69457943	G	A	SNV	Exonic	CCND1	p.E115K	1	0	0.39			Pass; -; -	missense	Damaging	Probably Damaging
17	45199894	C	T	SNV	Exonic	CDC27	p.G709R; p.G770R; p.G769R; p.G776R	1	0	0.31			Pass; -; -	missense	Damaging	Probably Damaging
17	45216262	A	G	SNV	Intronic	CDC27		1	0		4.2		-; Pass; -
17	45249379	C	T	SNV	Intronic; Exonic	CDC27	p.G52E	1	0	0.43			Pass; -; -	missense	Damaging	Probably Damaging
13	73336102	T	G	SNV	Exonic	DIS3	p.L605F; p.L737F; p.L767F; p.L644F	2	0	0.69	19.3		Pass; Pass; -	missense	Damaging	Probably Damaging			4911346
13	73336118	A	G	SNV	Exonic	DIS3	p.F732S; p.F600S; p.F639S; p.F762S	1	0	0.84			Pass; -; -	missense	Damaging	Probably Damaging
13	73337707	G	A	SNV	Exonic	DIS3	p.A508V; p.A640V; p.A547V; p.A670V	1	0	0.53			Pass; -; -	missense	Damaging	Probably Damaging
13	73347899	T	C	SNV	Exonic	DIS3	p.R265G; p.R358G; p.R388G; p.R226G	1	0	0.4			Pass; -; -	missense	Damaging	Probably Damaging
4	1808325	T	C	SNV	Exonic	FGFR3	p.Y583H; p.Y695H; p.Y697H	1	0	0.38			Pass; -; -	missense	Damaging	Probably Damaging
20	57415177	C	T	SNV	Promoter; Exonic	GNAS	p.R6W	1	0	0.41			Pass; -; -	missense		Probably Damaging
20	57429961	C	T	SNV	Exonic; Intronic	GNAS	p.A485V; p.R547R	1	0	1.24			Pass; -; -	missense; synonymous
20	57430066	C	T	SNV	Exonic; Intronic	GNAS	p.T520M; p.D582D	1	0	0.64			Pass; -; -	missense; synonymous					2764882
20	57430097	C	T	SNV	Exonic; Intronic	GNAS	p.F530F; p.Q593*	1	0	0.63			Pass; -; -	synonymous; stop gain
20	57430378	G	A	SNV	Exonic; Intronic	GNAS	p.C624Y; p.L686L	1	0		2.9		-; Pass; -	missense; synonymous
6	401621	G	A	SNV	ncRNA; Exonic	IRF4	p.V315M; p.V314M	1	0		2.96		-; Pass; -	missense	Damaging	Probably Damaging	780902340
1	115256529	T	C	SNV	Exonic	NRAS	p.Q61R	1	0		8.49		-; Pass; -	missense	Damaging	Benign	11554290	RCV000014914.8; RCV000424960.1; RCV000440367.1; RCV000424721.1; RCV000438052.1; RCV000432961.1; RCV000419710.1; RCV000422078.1; RCV000424455.1; RCV000431883.1; RCV000430593.1; RCV000413804.1; RCV000148032.4; RCV000430407.1; RCV000435687.1; RCV000422278.1; RCV000114744.7; RCV000439264.1; RCV000441317.1; RCV000032847.8; RCV000445249.1; RCV000420832.1; RCV000114745.7; RCV000037574.3	28048; 584
3	178927423	C	T	SNV	Exonic	PIK3CA	p.L396F	1	0	1.47			Pass; -; -	missense	Damaging	Benign
3	178947154	G	A	SNV	Exonic	PIK3CA	p.G864S	1	0	0.62			Pass; -; -	missense	Tolerated	Benign
6	106547310	T	C	SNV	Exonic	PRDM1	p.Y49H; p.Y183H	1	0	0.41			Pass; -; -	missense	Damaging	Probably Damaging
13	48955525	A		Deletion	Exonic	RB1	p.K548fs*3	1	0	1.14			Pass; -; -	frameshift					5673099; 5673100
17	7572963	T		Deletion	Exonic; 3'UTR	TP53	p.K250fs; p.K382fs; p.K343fs; p.K223fs	1	0	0.58			Pass; -; -	frameshift					6024620; 1610825; 53256; 13747; 45874
17	7577596	A	G	SNV	Exonic	TP53	p.C70R; p.C97R; p.C229R; p.C190R	1	0	0.45			Pass; -; -	missense	Tolerated	Benign	1064794312	RCV000482930.1; RCV000492777.1	45612
17	7578445	A	T	SNV	Exonic	TP53	p.I123N; p.I3N; p.I162N; p.I30N	1	0		4		-; Pass; -	missense	Damaging	Probably Damaging			2744885; 11966; 327539; 327538; 327537; 3388215
17	7579358	C	T	SNV	Promoter; Exonic	TP53	p.R71H; p.R110H	1	0	0.57			Pass; -; -	missense	Tolerated	Benign	11540654	RCV000409407.1; RCV000228299.1; RCV000115719.6; RCV000122182.2	4603666; 46115
14	103342866	C	T	SNV	Intronic	TRAF3		1	0	0.48			Pass; -; -				376228222
14	103355896	G	A	SNV	Intronic; Splice Site	TRAF3		1	0	0.41			Pass; -; -
3	142168414	G	A	SNV	Promoter; Exonic	XRN1; ATR	p.R2598*	1	0		2.16		-; Pass; -	stop gain					1039335
Patient 10	Relapsed
Chromosome	Position	Reference Allele	Sample Allele	Variation Type	Gene Region	Gene Symbol	Protein Variant	Case Samples With Variant	Control Samples With Variant	Q19_S19 - Allele Fraction	19-BM_S17 - Allele Fraction	19-PB_S4 - Allele Fraction	Sample Upstream Filtering	Translation Impact	SIFT Function Prediction	PolyPhen-2 Function Prediction	dbSNP ID	CLINVAR ID	COSMIC ID
11	108163407	C	T	SNV	Exonic	ATM	p.Q1500*	1	0	0.46			Pass; -; -	stop gain					4017631; 4017630
3	142259804	T	C	SNV	Exonic	ATR	p.M1175V	1	0	0.6			Pass; -; -	missense	Damaging	Possibly Damaging
11	108196794	A	G	SNV	Intronic; Exonic	C11orf65; ATM	p.R2273G	1	0	1.06			Pass; -; -	missense	Damaging	Probably Damaging
4	1804705	A	G	SNV	Intronic; Exonic	FGFR3	p.D332G	1	0		0.3		-; Pass; -	missense	Damaging	Possibly Damaging
20	57415195	C	T	SNV	Promoter; Exonic	GNAS	p.R12*	1	0	0.35			Pass; -; -	stop gain
12	25380275	T	G	SNV	Exonic	KRAS	p.Q61H	1	0		33.5		-; Pass; -	missense	Damaging	Benign	17851045	RCV000154530.3; RCV000444370.1; RCV000424748.1	14201; 554; 1135364
12	25380276	T	A	SNV	Exonic	KRAS	p.Q61L	1	0		2.83		-; Pass; -	missense	Damaging	Possibly Damaging	121913240	RCV000443593.1; RCV000437806.1; RCV000202407.1; RCV000038258.3	1140131; 1169551; 553
17	7579364	C	T	SNV	Promoter; Exonic	TP53	p.G69D; p.G108D	1	0	0.61			Pass; -; -	missense	Tolerated	Benign			45925
Patient 11	Relapsed
Chromosome	Position	Reference Allele	Sample Allele	Variation Type	Gene Region	Gene Symbol	Protein Variant	Case Samples With Variant	Control Samples With Variant	Q20_S20 - Allele Fraction	20-BM_S18 - Allele Fraction	20-PB_S5 - Allele Fraction	Sample Upstream Filtering	Translation Impact	SIFT Function Prediction	PolyPhen-2 Function Prediction	dbSNP ID	CLINVAR ID	COSMIC ID
17	79478621	A	G	SNV	ncRNA; Exonic	ACTG1	p.M132T	1	0	0.62			Pass; -; -	missense	Damaging	Probably Damaging
11	108121513	C	T	SNV	Exonic	ATM	p.Q441*	1	0	0.71			Pass; -; -	stop gain
11	108164124	C	T	SNV	Exonic	ATM	p.P1566S	1	0	0.46			Pass; -; -	missense	Damaging	Probably Damaging
3	142177912	A	G	SNV	Exonic	ATR	p.M2464T	1	0	0.87			Pass; -; -	missense	Damaging	Possibly Damaging
11	108201036	A	G	SNV	Intronic; Exonic	C11orf65; ATM	p.E2468G	1	0	0.5			Pass; -; -	missense	Damaging	Probably Damaging
11	108224592	A	G	SNV	Intronic; Exonic	C11orf65; ATM	p.E2924G	1	0	1.37			Pass; -; -	missense	Damaging	Probably Damaging
17	45214624	C	T	SNV	Exonic	CDC27	p.A603T; p.A602T; p.A542T; p.A609T	1	0	0.49			Pass; -; -	missense	Damaging	Probably Damaging
13	73348084	C	T	SNV	Exonic	DIS3	p.E337E; p.E205E; p.E367E; p.E244E	1	0	1.33			Pass; -; -	synonymous
13	73352489	T	C	SNV	5'UTR; Exonic	DIS3	p.E16G; p.E109G; p.E139G	1	0	0.84			Pass; -; -	missense	Damaging	Probably Damaging
12	25380271	C	T	SNV	Exonic	KRAS	p.E63K	1	0		0.34		-; Pass; -	missense	Damaging	Possibly Damaging			1360847; 133837; 27159
3	178928056	T	C	SNV	Exonic	PIK3CA	p.L445P	1	0	0.43			Pass; -; -	missense	Tolerated	Possibly Damaging
13	49030464	C	T	SNV	Exonic	RB1	p.L647F	1	0	0.89			Pass; -; -	missense	Damaging	Probably Damaging
3	142168387	T	C	SNV	Promoter; Exonic	XRN1; ATR	p.N2607D	1	0	0.43			Pass; -; -	missense	Damaging	Probably Damaging
Patient 12	Relapsed
Chromosome	Position	Reference Allele	Sample Allele	Variation Type	Gene Region	Gene Symbol	Protein Variant	Case Samples With Variant	Control Samples With Variant	Q21_S21 - Allele Fraction	21-BM_S19 - Allele Fraction	21-PB_S6 - Allele Fraction	Sample Upstream Filtering	Translation Impact	SIFT Function Prediction	PolyPhen-2 Function Prediction	dbSNP ID	CLINVAR ID	COSMIC ID
11	108139302	C	T	SNV	Exonic	ATM	p.T935M	1	0	0.81			-; Pass; -	missense	Tolerated	Benign	3218708	RCV000131651.5; RCV000211988.2; RCV000204695.3
11	108196144	G	A	SNV	Intronic; Exonic	C11orf65; ATM	p.R2227H	1	0	0.4			-; Pass; -	missense	Damaging	Probably Damaging	879254132	RCV000235577.1	6036483; 6036484
13	73352457	G	A	SNV	5'UTR; Exonic	DIS3	p.R27*; p.R120*; p.R150*	1	0	0.52			-; Pass; -	stop gain			142487656
5	137802544	C	T	SNV	Exonic	EGR1	p.R136C	1	0		0.47		Pass; -; -	missense	Damaging	Probably Damaging
4	1807850	G	A	SNV	Exonic	FGFR3	p.G525R; p.G639R; p.G637R	1	0		0.38		Pass; -; -	missense	Damaging	Probably Damaging
4	1807889	A	G	SNV	Exonic	FGFR3	p.K652E; p.K538E; p.K650E	1	0	0.69			-; Pass; -	missense	Damaging	Probably Damaging	78311289	RCV000017730.5; RCV000255799.1; RCV000017728.24; RCV000433411.1; RCV000017729.5	35899; 719; 1757111
20	57429748	C	G	SNV	Exonic; Intronic	GNAS	p.A476A; p.P414R	1	0	1.2			-; Pass; -	missense; synonymous			559714658
17	7577560	A	T	SNV	Exonic	TP53	p.S202T; p.S82T; p.S241T; p.S109T	1	0		0.47		Pass; -; -	missense	Damaging	Probably Damaging			303889; 5752585; 44067; 303888; 5752584
Patient 13	Relapsed
Chromosome	Position	Reference Allele	Sample Allele	Variation Type	Gene Region	Gene Symbol	Protein Variant	Case Samples With Variant	Control Samples With Variant	Q27_S27 - Allele Fraction	27-BM_S21 - Allele Fraction	27-PB_S12 - Allele Fraction	Sample Upstream Filtering	Translation Impact	SIFT Function Prediction	PolyPhen-2 Function Prediction	dbSNP ID	CLINVAR ID	COSMIC ID
17	79478963	A	G	SNV	ncRNA; Exonic	ACTG1	p.L110P	1	0		0.26		Pass; -; -	missense	Damaging	Probably Damaging
17	79479098	A	C	SNV	ncRNA; Exonic	ACTG1	p.L65R	1	0	9.49			-; Pass; -	missense	Damaging	Probably Damaging
11	108139302	C	T	SNV	Exonic	ATM	p.T935M	1	0	0.52			-; Pass; -	missense	Tolerated	Benign	3218708	RCV000131651.5; RCV000211988.2; RCV000204695.3
3	142281897	C	A	SNV	Exonic	ATR	p.C116F	1	0	3.1			-; Pass; -	missense	Damaging	Probably Damaging
11	108199955	C	T	SNV	Intronic; Exonic	C11orf65; ATM	p.Q2433*	1	0	0.59			-; Pass; -	stop gain					3443167; 3443168
1	118166129		A	Insertion	Exonic	FAM46C	p.S214fs*7	1	0	2.8			-; Pass; -	frameshift
4	1805471	A	G	SNV	Intronic; Exonic	FGFR3	p.N328S	1	0	0.45			-; Pass; -	missense	Damaging	Probably Damaging
20	57485825	T	C	SNV	Exonic; 3'UTR	GNAS	p.F317L; p.F376L; p.F377L; p.F1019L; p.F361L; p.F362L	1	0		0.3		Pass; -; -	missense	Damaging	Probably Damaging
6	26156933	C	G	SNV	Promoter; Exonic	HIST1H1E; HIST1H2BD	p.F105L	1	0	10.05			-; Pass; -	missense	Damaging	Possibly Damaging	369540490
3	178936082	G	A	SNV	Exonic	PIK3CA	p.E542K	1	0	1.68			-; Pass; -	missense	Tolerated	Probably Damaging	121913273	RCV000445059.1; RCV000441707.1; RCV000419440.1; RCV000438815.1; RCV000435811.1; RCV000426691.1; RCV000442348.1; RCV000431872.1; RCV000433007.1; RCV000024622.6; RCV000151649.1; RCV000424422.1; RCV000430763.1; RCV000420078.1; RCV000436932.1; RCV000154513.2; RCV000421639.1; RCV000425548.1; RCV000416776.1; RCV000419905.1; RCV000431000.1	760; 29329; 125369
3	178947865	G	A	SNV	Exonic	PIK3CA	p.G914R	1	0	0.44			-; Pass; -	missense	Damaging	Possibly Damaging	587776932	RCV000032907.5; RCV000414672.1	3205661; 3205660; 5881414
3	178948136	G	A	SNV	Exonic	PIK3CA	p.E970K	1	0	3.79			-; Pass; -	missense	Tolerated	Benign			94981; 94980
6	106555073	C	G	SNV	Exonic	PRDM1	p.I596M; p.I730M	1	0	0.61			-; Pass; -	missense	Damaging	Possibly Damaging
Patient 14	Relapsed
Chromosome	Position	Reference Allele	Sample Allele	Variation Type	Gene Region	Gene Symbol	Protein Variant	Case Samples With Variant	Control Samples With Variant	Q30_S30 - Allele Fraction	30-BM_S22 - Allele Fraction	30-PB_S15 - Allele Fraction	Sample Upstream Filtering	Translation Impact	SIFT Function Prediction	PolyPhen-2 Function Prediction	dbSNP ID	CLINVAR ID	COSMIC ID
7	140453154	T	G	SNV	Exonic	BRAF	p.D594A	2	0	0.79	10.06		Pass; Pass; -	missense	Damaging	Probably Damaging	121913338	RCV000420477.1	6056853; 1583010
17	45249355	A	G	SNV	Intronic; Exonic	CDC27	p.L60P	1	0		0.64		Pass; -; -	missense	Damaging	Probably Damaging
1	118165500	GA		Deletion	Exonic	FAM46C	p.S5fs*18	1	0		6.52		Pass; -; -	frameshift
1	118166485	T	C	SNV	Exonic	FAM46C	p.L332P	1	0		7.33		Pass; -; -	missense	Damaging	Probably Damaging
1	115258747	C	A	SNV	Exonic	NRAS	p.G12V	2	0	0.54	6.13		Pass; Fail; -	missense	Damaging	Possibly Damaging	121913237	RCV000429393.1; RCV000423890.1; RCV000439421.1; RCV000421072.1; RCV000438967.1; RCV000432178.1; RCV000037576.2; RCV000158986.1; RCV000419124.1; RCV000438750.1	46504; 566
Patient 15	Relapsed
Chromosome	Position	Reference Allele	Sample Allele	Variation Type	Gene Region	Gene Symbol	Protein Variant	Case Samples With Variant	Control Samples With Variant	Q31_S1_R1 - Allele Fraction	BM31_S2_R1 - Allele Fraction	PB31_S3_R1 - Allele Fraction	Sample Upstream Filtering	Translation Impact	SIFT Function Prediction	PolyPhen-2 Function Prediction	dbSNP ID	CLINVAR ID	COSMIC ID
17	79479108	G	A	SNV	ncRNA; Exonic	ACTG1	p.R62C	1	0	0.52			Pass; -; -	missense	Damaging	Possibly Damaging
11	108196144	G	A	SNV	Intronic; Exonic	C11orf65; ATM	p.R2227H	1	0		0.29		-; Pass; -	missense	Damaging	Probably Damaging	879254132	RCV000235577.1	6036483; 6036484
13	73355047	C	T	SNV	Promoter; Exonic; Intronic; 5'UTR	DIS3; PIBF1	p.R108H	1	0		0.34		-; Pass; -	missense	Damaging	Probably Damaging
4	1807841	G	A	SNV	Exonic	FGFR3	p.A636T; p.A634T; p.A522T	1	0	0.43			Pass; -; -	missense	Damaging	Probably Damaging
20	57428518	G	A	SNV	Exonic; Intronic	GNAS	p.E66E; p.R4K	1	0	0.45			Pass; -; -	missense; synonymous
17	7577112	C	T	SNV	Exonic	TP53	p.A276T; p.A117T; p.A144T; p.A237T	1	0	0.49			Pass; -; -	missense	Damaging	Possibly Damaging			44114
Patient 16	new diagnosis
Chromosome	Position	Reference Allele	Sample Allele	Variation Type	Gene Region	Gene Symbol	Protein Variant	Case Samples With Variant	Control Samples With Variant	Q32_S4_R1 - Allele Fraction	BM32_S5_R1 - Allele Fraction	PB32_S6_R1 - Allele Fraction	Sample Upstream Filtering	Translation Impact	SIFT Function Prediction	PolyPhen-2 Function Prediction	dbSNP ID	CLINVAR ID	COSMIC ID
17	79478621	A	G	SNV	ncRNA; Exonic	ACTG1	p.M132T	1	0	0.58			Pass; -; -	missense	Damaging	Probably Damaging
11	108115684	G		Deletion	Exonic	ATM	p.V278fs*42	1	0	0.64			Pass; -; -	frameshift
7	140453155	C	T	SNV	Exonic	BRAF	p.D594N	1	0		0.46		-; Pass; -	missense	Damaging	Probably Damaging	397516896	RCV000444338.1; RCV000432782.1; RCV000434944.1; RCV000443573.1; RCV000425325.1; RCV000037931.2; RCV000422928.1; RCV000425110.1; RCV000440132.1; RCV000417722.1; RCV000432575.1	26457; 27639
11	69456212	A	C	SNV	Exonic	CCND1	p.Y44S	1	0		11.04		-; Pass; -	missense	Damaging	Probably Damaging			1644311; 1644312
17	45214623	G	A	SNV	Exonic	CDC27	p.A542V; p.A609V; p.A603V; p.A602V	1	0		0.36		-; Pass; -	missense	Damaging	Probably Damaging	75637741
17	45219359		C	Insertion	Exonic	CDC27	p.K470fs*41; p.K471fs*41; p.K410fs*41; p.K477fs*41	1	0	0.62			Pass; -; -	frameshift
1	118166465		CG	Insertion	Exonic	FAM46C	p.R327fs*5	1	0		4.53		-; Pass; -	frameshift
12	25380275	T	G	SNV	Exonic	KRAS	p.Q61H	1	0		9.17		-; Pass; -	missense	Damaging	Benign	17851045	RCV000154530.3; RCV000444370.1; RCV000424748.1	14201; 554; 1135364
14	65560499	C	T	SNV	Exonic; ncRNA; 5'UTR	MAX; LOC100506321	p.R33Q; p.R24Q	1	0		0.35		-; Pass; -	missense	Damaging	Probably Damaging
Patient 17	new diagnosis
Chromosome	Position	Reference Allele	Sample Allele	Variation Type	Gene Region	Gene Symbol	Protein Variant	Case Samples With Variant	Control Samples With Variant	Q33_S7_R1 - Allele Fraction	BM33_S8_R1 - Allele Fraction	PB33_S9_R1 - Allele Fraction	Sample Upstream Filtering	Translation Impact	SIFT Function Prediction	PolyPhen-2 Function Prediction	dbSNP ID	CLINVAR ID	COSMIC ID
3	178936092	A	C	SNV	Exonic	PIK3CA	p.E545A	1	0	1.12			Pass; -; -	missense	Damaging	Probably Damaging	121913274	RCV000423900.1; RCV000014643.7; RCV000431339.1; RCV000428526.1; RCV000442696.1; RCV000431799.1; RCV000433952.1; RCV000432424.1; RCV000425497.1; RCV000437065.1; RCV000426777.1; RCV000436993.1; RCV000421111.1; RCV000154515.1; RCV000420659.1; RCV000435323.1; RCV000439842.1; RCV000427464.1; RCV000427271.1; RCV000429810.1; RCV000441944.1; RCV000419838.1; RCV000438145.1; RCV000439182.1; RCV000441159.1;…	85759; 12458; 297145
Patient 18	Relapsed
Chromosome	Position	Reference Allele	Sample Allele	Variation Type	Gene Region	Gene Symbol	Protein Variant	Case Samples With Variant	Control Samples With Variant	Q34_S10_R1 - Allele Fraction	BM34_S11_R1 - Allele Fraction	PB34_S12_R1 - Allele Fraction	Sample Upstream Filtering	Translation Impact	SIFT Function Prediction	PolyPhen-2 Function Prediction	dbSNP ID	CLINVAR ID	COSMIC ID
17	45249379	C	T	SNV	Intronic; Exonic	CDC27	p.G52E	1	0	0.8			Pass; -; -	missense	Damaging	Probably Damaging
20	57428331	G	A	SNV	Exonic; Intronic; 5'UTR	GNAS	p.R4H	1	0	0.57			Pass; -; -	missense		Possibly Damaging	545306394	RCV000121177.1
Patient 19	Relapsed
Chromosome	Position	Reference Allele	Sample Allele	Variation Type	Gene Region	Gene Symbol	Protein Variant	Case Samples With Variant	Control Samples With Variant	Q35_S13_R1 - Allele Fraction	BM35_S14_R1 - Allele Fraction	PB35_S15_R1 - Allele Fraction	Sample Upstream Filtering	Translation Impact	SIFT Function Prediction	PolyPhen-2 Function Prediction	dbSNP ID	CLINVAR ID	COSMIC ID
11	108115670		C	Insertion	Exonic	ATM	p.S274fs*8	1	0	0.59			Pass; -; -	frameshift
11	108115684	G		Deletion	Exonic	ATM	p.V278fs*42	1	0	0.6			Pass; -; -	frameshift
3	142274923	G	A	SNV	Exonic	ATR	p.Q713*	1	0	0.6			Pass; -; -	stop gain
7	140453136	A	T	SNV	Exonic	BRAF	p.V600E	2	0	16.92	28.81		Pass; Pass; -	missense	Damaging	Probably Damaging	113488022	RCV000424470.1; RCV000429915.1; RCV000425847.1; RCV000440540.1; RCV000425166.1; RCV000430562.1; RCV000443448.1; RCV000432628.1; RCV000440802.1; RCV000417746.1; RCV000067669.14; RCV000037936.3; RCV000080903.4; RCV000443745.1; RCV000435441.1; RCV000433305.1; RCV000014992.14; RCV000014993.15; RCV000014994.14; RCV000022677.14; RCV000208763.1; RCV000420614.1	476; 1131
16	50816332	T	G	SNV	Exonic	CYLD	p.I594S; p.I591S	1	0		1.43		-; Pass; -	missense	Damaging	Probably Damaging
13	73355894	C	T	SNV	Promoter; Exonic; 5'UTR	DIS3; PIBF1	p.R26Q	1	0	1.5			Pass; -; -	missense	Damaging	Probably Damaging
4	1806204	C		Deletion	Intronic; Exonic	FGFR3	p.T412fs*22; p.T410fs*22	1	0		0.4		-; Pass; -	frameshift
17	7577538	C	T	SNV	Exonic	TP53	p.R89Q; p.R209Q; p.R116Q; p.R248Q	1	0	1.03			Pass; -; -	missense	Damaging	Possibly Damaging	11540652	RCV000435533.1; RCV000115736.8; RCV000445235.1; RCV000441226.1; RCV000197114.3; RCV000421893.1; RCV000424869.1; RCV000437291.1; RCV000420303.1; RCV000426233.1; RCV000421194.1; RCV000179773.1; RCV000419135.1; RCV000427709.1; RCV000445244.1; RCV000420727.1; RCV000433424.1; RCV000428591.1; RCV000437518.1; RCV000426359.1; RCV000439963.1; RCV000148913.1; RCV000013150.22; RCV000235221.2; RCV000417916.1…	10662; 99602; 3356964; 87196; 99020; 1640830
patient 20	Relapsed
Chromosome	Position	Reference Allele	Sample Allele	Variation Type	Gene Region	Gene Symbol	Protein Variant	Case Samples With Variant	Control Samples With Variant	Q36_S16_R1 - Allele Fraction	BM36_S17_R1 - Allele Fraction	PB36_S18_R1 - Allele Fraction	Sample Upstream Filtering	Translation Impact	SIFT Function Prediction	PolyPhen-2 Function Prediction	dbSNP ID	CLINVAR ID	COSMIC ID
17	45234325	G	A	SNV	Exonic	CDC27	p.R205*; p.R266*	1	0		1.3		-; Pass; -	stop gain			769120753
17	45234411	G	T	SNV	Exonic	CDC27	p.S237*; p.S176*	1	0		3.18		-; Pass; -	stop gain			755441004
17	45234491	C	A	SNV	Splice Site	CDC27		1	0		1.73		-; Pass; -
17	45234711		A	Insertion	Exonic	CDC27	p.S111fs*6; p.S172fs*6	1	0	0.3			Pass; -; -	frameshift
4	1806599	C	T	SNV	Exonic	FGFR3	p.R439C; p.R441C; p.R327C	1	0		0.26		-; Pass; -	missense	Damaging	Probably Damaging	749083353
1	115258744	C	T	SNV	Exonic	NRAS	p.G13D	1	0		1.22		-; Pass; -	missense	Damaging	Benign	121434596	RCV000440593.1; RCV000430350.1; RCV000157672.1; RCV000144962.2; RCV000422699.1; RCV000431528.1; RCV000421906.1; RCV000014915.26; RCV000433031.1; RCV000431020.1; RCV000421229.1; RCV000440357.1; RCV000022690.25; RCV000442419.1	573; 46498
Patient 21	Relapsed
Chromosome	Position	Reference Allele	Sample Allele	Variation Type	Gene Region	Gene Symbol	Protein Variant	Case Samples With Variant	Control Samples With Variant	Q37_S19_R1 - Allele Fraction	BM37_S20_R1 - Allele Fraction	PB37_S21_R1 - Allele Fraction	Sample Upstream Filtering	Translation Impact	SIFT Function Prediction	PolyPhen-2 Function Prediction	dbSNP ID	CLINVAR ID	COSMIC ID
7	140481411	C	T	SNV	Exonic	BRAF	p.G466E	2	0	5.6	30.11		Pass; Pass; -	missense	Damaging	Probably Damaging	121913351	RCV000443232.1; RCV000431475.1; RCV000434755.1; RCV000442274.1; RCV000424079.1; RCV000427285.1; RCV000437081.1	36127; 453
11	108196144	G	A	SNV	Intronic; Exonic	C11orf65; ATM	p.R2227H	1	0		0.23		-; Pass; -	missense	Damaging	Probably Damaging	879254132	RCV000235577.1	6036483; 6036484
17	45219359		C	Insertion	Exonic	CDC27	p.K470fs*41; p.K471fs*41; p.K410fs*41; p.K477fs*41	1	0	0.59			Pass; -; -	frameshift
4	1803401	G	A	SNV	Exonic	FGFR3	p.G224S	1	0		0.28		-; Pass; -	missense	Damaging	Probably Damaging
6	393303	C	T	SNV	ncRNA; Exonic	IRF4	p.R51C	1	0	0.38			Pass; -; -	missense	Damaging	Probably Damaging			1239151
12	25380268	A	T	SNV	Exonic	KRAS	p.Y64N	2	0	4.64	7.04		Pass; Pass; -	missense	Damaging	Probably Damaging			5022495; 5022494
12	25378562	C	T	SNV	Exonic	KRAS	p.A146T	1	0		22.59		-; Pass; -	missense	Damaging	Possibly Damaging	121913527	RCV000426420.1; RCV000178223.1	1165198; 1716533; 19404
12	25398284	C	A	SNV	Exonic	KRAS	p.G12V	1	0		0.6		-; Pass; -	missense	Damaging	Probably Damaging	121913529	RCV000439101.1; RCV000154262.2; RCV000013413.4; RCV000029216.4; RCV000439750.1; RCV000150895.1; RCV000157944.2; RCV000417765.1; RCV000428010.1	1140133; 520; 25879
14	103363706	C	T	SNV	Exonic	TRAF3	p.R310*; p.R227*; p.R285*	1	0		4.58		-; Pass; -	stop gain					144682
3	142168390	G	A	SNV	Promoter; Exonic	XRN1; ATR	p.R2606*	1	0	0.33			Pass; -; -	stop gain			749753899
Patient 22	Relapsed
Chromosome	Position	Reference Allele	Sample Allele	Variation Type	Gene Region	Gene Symbol	Protein Variant	Case Samples With Variant	Control Samples With Variant	Q38_S22_R1 - Allele Fraction	BM38_S23_R1 - Allele Fraction	PB38_S24_R1 - Allele Fraction	Sample Upstream Filtering	Translation Impact	SIFT Function Prediction	PolyPhen-2 Function Prediction	dbSNP ID	CLINVAR ID	COSMIC ID
17	45219359		C	Insertion	Exonic	CDC27	p.K470fs*41; p.K471fs*41; p.K410fs*41; p.K477fs*41	1	0	0.92			Pass; -; -	frameshift
17	45249379	C	T	SNV	Intronic; Exonic	CDC27	p.G52E	1	0	1.11			Pass; -; -	missense	Damaging	Probably Damaging
1	118166268	C	T	SNV	Exonic	FAM46C	p.Q260*	1	0	0.35			Pass; -; -	stop gain
4	1803748	T	A	SNV	Exonic	FGFR3	p.L309H	1	0	1.01			Pass; -; -	missense	Damaging	Probably Damaging
6	394891	G	A	SNV	ncRNA; Exonic	IRF4	p.R96H	1	0	0.58			Pass; -; -	missense	Damaging	Probably Damaging
3	178936092	A	C	SNV	Exonic	PIK3CA	p.E545A	1	0	1.21			Pass; -; -	missense	Damaging	Probably Damaging	121913274	RCV000423900.1; RCV000014643.7; RCV000431339.1; RCV000428526.1; RCV000442696.1; RCV000431799.1; RCV000433952.1; RCV000432424.1; RCV000425497.1; RCV000437065.1; RCV000426777.1; RCV000436993.1; RCV000421111.1; RCV000154515.1; RCV000420659.1; RCV000435323.1; RCV000439842.1; RCV000427464.1; RCV000427271.1; RCV000429810.1; RCV000441944.1; RCV000419838.1; RCV000438145.1; RCV000439182.1; RCV000441159.1;…	85759; 12458; 297145
Patient 23	Relapsed
Chromosome	Position	Reference Allele	Sample Allele	Variation Type	Gene Region	Gene Symbol	Protein Variant	Case Samples With Variant	Control Samples With Variant	Q39_S25_R1 - Allele Fraction	BM39_S26_R1 - Allele Fraction	PB39_S27_R1 - Allele Fraction	Sample Upstream Filtering	Translation Impact	SIFT Function Prediction	PolyPhen-2 Function Prediction	dbSNP ID	CLINVAR ID	COSMIC ID
17	45249379	C	T	SNV	Intronic; Exonic	CDC27	p.G52E	1	0	0.66			Pass; -; -	missense	Damaging	Probably Damaging
5	137801527	C	T	SNV	Exonic	EGR1	p.S26L	1	0	0.56			Pass; -; -	missense	Damaging	Probably Damaging
20	57428908	A	G	SNV	Exonic; Intronic	GNAS	p.E134G; p.G196G	1	0	1.06			Pass; -; -	missense; synonymous
12	25380275	T	G	SNV	Exonic	KRAS	p.Q61H	1	0		6.78		-; Pass; -	missense	Damaging	Benign	17851045	RCV000154530.3; RCV000444370.1; RCV000424748.1	14201; 554; 1135364
1	115256529	T	C	SNV	Exonic	NRAS	p.Q61R	1	0		3.26		-; Pass; -	missense	Damaging	Benign	11554290	RCV000014914.8; RCV000424960.1; RCV000440367.1; RCV000424721.1; RCV000438052.1; RCV000432961.1; RCV000419710.1; RCV000422078.1; RCV000424455.1; RCV000431883.1; RCV000430593.1; RCV000413804.1; RCV000148032.4; RCV000430407.1; RCV000435687.1; RCV000422278.1; RCV000114744.7; RCV000439264.1; RCV000441317.1; RCV000032847.8; RCV000445249.1; RCV000420832.1; RCV000114745.7; RCV000037574.3	28048; 584
Patient 24	Relapsed
Chromosome	Position	Reference Allele	Sample Allele	Variation Type	Gene Region	Gene Symbol	Protein Variant	Case Samples With Variant	Control Samples With Variant	Q40_S28_R1 - Allele Fraction	BM40_S29_R1 - Allele Fraction	PB40_S30_R1 - Allele Fraction	Sample Upstream Filtering	Translation Impact	SIFT Function Prediction	PolyPhen-2 Function Prediction	dbSNP ID	CLINVAR ID	COSMIC ID
11	108114690	TG		Deletion	Exonic	ATM	p.Y171fs*13	2	0	2.17	34.08		Pass; Pass; -	frameshift
11	108202221	A	C	SNV	Intronic; Exonic	C11orf65; ATM	p.Q2522H	2	0	1.78	31.54		Pass; Pass; -	missense	Damaging	Probably Damaging
13	49039408	G	A	SNV	Exonic	RB1	p.R798Q	1	0		0.21		-; Pass; -	missense	Damaging	Probably Damaging	374523971		1942430; 1942431
Patient 25	Relapsed
Chromosome	Position	Reference Allele	Sample Allele	Variation Type	Gene Region	Gene Symbol	Protein Variant	Case Samples With Variant	Control Samples With Variant	Q41_S31_R1 - Allele Fraction	BM41_S32_R1 - Allele Fraction	PB41_S33_R1 - Allele Fraction	Sample Upstream Filtering	Translation Impact	SIFT Function Prediction	PolyPhen-2 Function Prediction	dbSNP ID	CLINVAR ID	COSMIC ID
11	108196144	G	A	SNV	Intronic; Exonic	C11orf65; ATM	p.R2227H	1	0		0.26		-; Pass; -	missense	Damaging	Probably Damaging	879254132	RCV000235577.1	6036483; 6036484
11	69462878	C	T	SNV	Exonic	CCND1	p.R231C	1	0		0.47		-; Pass; -	missense	Damaging	Possibly Damaging	745779714
17	45249379	C	T	SNV	Intronic; Exonic	CDC27	p.G52E	1	0	0.72			Pass; -; -	missense	Damaging	Probably Damaging
13	73355942	T		Deletion	Promoter; Exonic; 5'UTR	DIS3; PIBF1	p.K10fs*7	1	0		0.45		-; Pass; -	frameshift
12	25380275	T	G	SNV	Exonic	KRAS	p.Q61H	2	0	5.27	41.79		Pass; Pass; -	missense	Damaging	Benign	17851045	RCV000154530.3; RCV000444370.1; RCV000424748.1	14201; 554; 1135364
Patient 26	Relapsed
Chromosome	Position	Reference Allele	Sample Allele	Variation Type	Gene Region	Gene Symbol	Protein Variant	Case Samples With Variant	Control Samples With Variant	Q42_S34_R1 - Allele Fraction	BM42_S35_R1 - Allele Fraction	PB42_S36_R1 - Allele Fraction	Sample Upstream Filtering	Translation Impact	SIFT Function Prediction	PolyPhen-2 Function Prediction	dbSNP ID	CLINVAR ID	COSMIC ID
17	45234665	TTGTG		Deletion	Exonic	CDC27	p.T186fs*3; p.T125fs*3	1	0		0.59		-; Pass; -	frameshift					5030603; 5030604
17	45249379	C	T	SNV	Intronic; Exonic	CDC27	p.G52E	1	0	0.4			Pass; -; -	missense	Damaging	Probably Damaging
1	115256529	T	C	SNV	Exonic	NRAS	p.Q61R	2	0	0.8	33		Pass; Pass; -	missense	Damaging	Benign	11554290	RCV000014914.8; RCV000424960.1; RCV000440367.1; RCV000424721.1; RCV000438052.1; RCV000432961.1; RCV000419710.1; RCV000422078.1; RCV000424455.1; RCV000431883.1; RCV000430593.1; RCV000413804.1; RCV000148032.4; RCV000430407.1; RCV000435687.1; RCV000422278.1; RCV000114744.7; RCV000439264.1; RCV000441317.1; RCV000032847.8; RCV000445249.1; RCV000420832.1; RCV000114745.7; RCV000037574.3	28048; 584
Patient 27	Relapsed
Chromosome	Position	Reference Allele	Sample Allele	Variation Type	Gene Region	Gene Symbol	Protein Variant	Case Samples With Variant	Control Samples With Variant	Q43_S37_R1 - Allele Fraction	BM43_S38_R1 - Allele Fraction	PB43_S39_R1 - Allele Fraction	Sample Upstream Filtering	Translation Impact	SIFT Function Prediction	PolyPhen-2 Function Prediction	dbSNP ID	CLINVAR ID	COSMIC ID
3	142238553	G	A	SNV	Exonic	ATR	p.P1447L	1	0	0.39			Pass; -; -	missense	Damaging	Probably Damaging
12	25380275	T	G	SNV	Exonic	KRAS	p.Q61H	1	0		3.65		-; Pass; -	missense	Damaging	Benign	17851045	RCV000154530.3; RCV000444370.1; RCV000424748.1	14201; 554; 1135364
12	25380277	GA	TC	Substitution	Exonic	KRAS	p.Q61K	1	0		16.87		-; Pass; -	in-frame	Damaging	Benign			5030910
Patient 28	Relapsed
Chromosome	Position	Reference Allele	Sample Allele	Variation Type	Gene Region	Gene Symbol	Protein Variant	Case Samples With Variant	Control Samples With Variant	Q44_S40_R1 - Allele Fraction	BM44_S41_R1 - Allele Fraction	PB44_S42_R1 - Allele Fraction	Sample Upstream Filtering	Translation Impact	SIFT Function Prediction	PolyPhen-2 Function Prediction	dbSNP ID	CLINVAR ID	COSMIC ID
11	108201074	G	A	SNV	Intronic; Exonic	C11orf65; ATM	p.D2481N	1	0	0.56			Pass; -; -	missense	Damaging	Probably Damaging
Patient 29	Relapsed
Chromosome	Position	Reference Allele	Sample Allele	Variation Type	Gene Region	Gene Symbol	Protein Variant	Case Samples With Variant	Control Samples With Variant	Q45_S43_R1 - Allele Fraction	BM45_S44_R1 - Allele Fraction	PB45_S45_R1 - Allele Fraction	Sample Upstream Filtering	Translation Impact	SIFT Function Prediction	PolyPhen-2 Function Prediction	dbSNP ID	CLINVAR ID	COSMIC ID
3	142176503	C	T	SNV	Exonic	ATR	p.R2533Q	1	0		0.2		-; Pass; -	missense	Damaging	Probably Damaging	763127779
11	108180904	T		Deletion	Intronic; Exonic	C11orf65; ATM	p.F1928fs*9	1	0		0.84		-; Pass; -	frameshift
16	50784009	C	T	SNV	Exonic	CYLD	p.Q134*	1	0		5.99		-; Pass; -	stop gain
13	73346905	C	T	SNV	Exonic	DIS3	p.D315N; p.D438N; p.D276N; p.D408N	1	0		0.27		-; Pass; -	missense	Damaging	Possibly Damaging	35288597		1180113
13	73355069	G	A	SNV	Promoter; Exonic; Intronic; 5'UTR	DIS3; PIBF1	p.R101C	1	0	0.41			Pass; -; -	missense	Damaging	Possibly Damaging	775752957
1	118166315	C	A	SNV	Exonic	FAM46C	p.F275L	1	0		5.4		-; Pass; -	missense	Damaging	Probably Damaging
20	57430369	G	A	SNV	Exonic; Intronic	GNAS	p.T683T; p.R621H	1	0		0.31		-; Pass; -	missense; synonymous			960503986
Patient 30	Relapsed
Chromosome	Position	Reference Allele	Sample Allele	Variation Type	Gene Region	Gene Symbol	Protein Variant	Case Samples With Variant	Control Samples With Variant	Q47_S49_R1 - Allele Fraction	BM47_S50_R1 - Allele Fraction	PB47_S51_R1 - Allele Fraction	Sample Upstream Filtering	Translation Impact	SIFT Function Prediction	PolyPhen-2 Function Prediction	dbSNP ID	CLINVAR ID	COSMIC ID
17	45249379	C	T	SNV	Intronic; Exonic	CDC27	p.G52E	2	0	0.87	0.24		Pass; Pass; -	missense	Damaging	Probably Damaging
6	394897	G	A	SNV	ncRNA; Exonic	IRF4	p.R98Q	1	0	0.32			Pass; -; -	missense	Damaging	Probably Damaging			5904830
1	115256529	T	C	SNV	Exonic	NRAS	p.Q61R	1	0		1.7		-; Pass; -	missense	Damaging	Benign	11554290	RCV000014914.8; RCV000424960.1; RCV000440367.1; RCV000424721.1; RCV000438052.1; RCV000432961.1; RCV000419710.1; RCV000422078.1; RCV000424455.1; RCV000431883.1; RCV000430593.1; RCV000413804.1; RCV000148032.4; RCV000430407.1; RCV000435687.1; RCV000422278.1; RCV000114744.7; RCV000439264.1; RCV000441317.1; RCV000032847.8; RCV000445249.1; RCV000420832.1; RCV000114745.7; RCV000037574.3	28048; 584
Patient 31	Relapsed
Chromosome	Position	Reference Allele	Sample Allele	Variation Type	Gene Region	Gene Symbol	Protein Variant	Case Samples With Variant	Control Samples With Variant	Q48_S52_R1 - Allele Fraction	BM48_S53_R1 - Allele Fraction	PB48_S54_R1 - Allele Fraction	Sample Upstream Filtering	Translation Impact	SIFT Function Prediction	PolyPhen-2 Function Prediction	dbSNP ID	CLINVAR ID	COSMIC ID
17	79479058	G	C	SNV	ncRNA; Exonic	ACTG1	p.N78K	1	0		21.28		-; Pass; -	missense	Damaging	Probably Damaging
17	79479098	A	C	SNV	ncRNA; Exonic	ACTG1	p.L65R	1	0		21.63		-; Pass; -	missense	Damaging	Probably Damaging
3	142218523	C	T	SNV	Exonic	ATR	p.E1776K	1	0	0.69			Pass; -; -	missense	Damaging	Probably Damaging
13	73337683		T	Insertion	Exonic	DIS3	p.I555fs*3; p.I678fs*3; p.I648fs*3; p.I516fs*3	1	0		0.48		-; Pass; -	frameshift					4677626
13	73355047	C	T	SNV	Promoter; Exonic; Intronic; 5'UTR	DIS3; PIBF1	p.R108H	1	0		0.36		-; Pass; -	missense	Damaging	Probably Damaging
4	1803171	C	T	SNV	Exonic	FGFR3	p.R175C	1	0	0.33			Pass; -; -	missense	Damaging	Probably Damaging
3	178936092	A	C	SNV	Exonic	PIK3CA	p.E545A	1	0	1.14			Pass; -; -	missense	Damaging	Probably Damaging	121913274	RCV000423900.1; RCV000014643.7; RCV000431339.1; RCV000428526.1; RCV000442696.1; RCV000431799.1; RCV000433952.1; RCV000432424.1; RCV000425497.1; RCV000437065.1; RCV000426777.1; RCV000436993.1; RCV000421111.1; RCV000154515.1; RCV000420659.1; RCV000435323.1; RCV000439842.1; RCV000427464.1; RCV000427271.1; RCV000429810.1; RCV000441944.1; RCV000419838.1; RCV000438145.1; RCV000439182.1; RCV000441159.1;…	85759; 12458; 297145
Patient 32	Relapsed
Chromosome	Position	Reference Allele	Sample Allele	Variation Type	Gene Region	Gene Symbol	Protein Variant	Case Samples With Variant	Control Samples With Variant	Q49_S55_R1 - Allele Fraction	BM49_S56_R1 - Allele Fraction	PB49_S57_R1 - Allele Fraction	Sample Upstream Filtering	Translation Impact	SIFT Function Prediction	PolyPhen-2 Function Prediction	dbSNP ID	CLINVAR ID	COSMIC ID
11	108119696	C	T	SNV	Exonic	ATM	p.Q368*	1	0	0.74			Pass; -; -	stop gain
7	140507863	C	T	SNV	Splice Site	BRAF		1	0	0.33			Pass; -; -
17	45249379	C	T	SNV	Intronic; Exonic	CDC27	p.G52E	2	0	1.14	0.31		Pass; Pass; -	missense	Damaging	Probably Damaging
17	45234665	TTGTG		Deletion	Exonic	CDC27	p.T186fs*3; p.T125fs*3	1	0		0.35		-; Pass; -	frameshift					5030603; 5030604
13	73346338	C	T	SNV	Exonic	DIS3	p.D326N; p.D458N; p.D365N; p.D488N	2	0	1.6	8.87		Pass; Pass; -	missense	Damaging	Probably Damaging			158635
13	73336065	T	C	SNV	Exonic	DIS3	p.R780G; p.R618G; p.R657G; p.R750G	1	0		0.41		-; Pass; -	missense	Damaging	Probably Damaging			1188725
13	73337717	T	G	SNV	Exonic	DIS3	p.M544L; p.M667L; p.M637L; p.M505L	1	0		5.63		-; Pass; -	missense	Damaging	Probably Damaging
13	73337735	A	T	SNV	Exonic	DIS3	p.S661T; p.S538T; p.S631T; p.S499T	1	0		5.31		-; Pass; -	missense	Damaging	Probably Damaging
13	73346341	C	G	SNV	Exonic	DIS3	p.D364H; p.D487H; p.D325H; p.D457H	1	0		0.63		-; Pass; -	missense	Damaging	Probably Damaging
20	57415193	G	A	SNV	Promoter; Exonic	GNAS	p.R11H	1	0		0.21		-; Pass; -	missense		Probably Damaging
6	394972	A	G	SNV	ncRNA; Exonic	IRF4	p.K123R	2	0	1.13	38.47		Pass; Pass; -	missense	Damaging	Probably Damaging			329431
1	115256529	T	C	SNV	Exonic	NRAS	p.Q61R	2	0	1.1	40.1		Pass; Pass; -	missense	Damaging	Benign	11554290	RCV000014914.8; RCV000424960.1; RCV000440367.1; RCV000424721.1; RCV000438052.1; RCV000432961.1; RCV000419710.1; RCV000422078.1; RCV000424455.1; RCV000431883.1; RCV000430593.1; RCV000413804.1; RCV000148032.4; RCV000430407.1; RCV000435687.1; RCV000422278.1; RCV000114744.7; RCV000439264.1; RCV000441317.1; RCV000032847.8; RCV000445249.1; RCV000420832.1; RCV000114745.7; RCV000037574.3	28048; 584
3	142168413	C	T	SNV	Promoter; Exonic	XRN1; ATR	p.R2598Q	1	0		0.23		-; Pass; -	missense	Damaging	Probably Damaging
Patient 33	Relapsed
Chromosome	Position	Reference Allele	Sample Allele	Variation Type	Gene Region	Gene Symbol	Protein Variant	Case Samples With Variant	Control Samples With Variant	Q50_S58_R1 - Allele Fraction	BM50_S59_R1 - Allele Fraction	PB50_S60_R1 - Allele Fraction	Sample Upstream Filtering	Translation Impact	SIFT Function Prediction	PolyPhen-2 Function Prediction	dbSNP ID	CLINVAR ID	COSMIC ID
17	79477817	C	T	SNV	ncRNA; Exonic	ACTG1	p.G343S	1	0	0.4			Pass; -; -	missense	Damaging	Probably Damaging
3	142224090	C	G	SNV	Exonic	ATR	p.R1696T	1	0		0.73		-; Pass; -	missense	Damaging	Probably Damaging
3	142232360	G	A	SNV	Exonic	ATR	p.Q1542*	1	0		27.38		-; Pass; -	stop gain
3	142266602	G	A	SNV	Exonic	ATR	p.Q1108*	1	0		0.63		-; Pass; -	stop gain
7	140481417	C	A	SNV	Exonic	BRAF	p.G464V	1	0		1.46		-; Pass; -	missense	Damaging	Probably Damaging	121913348	RCV000426199.1; RCV000033302.4; RCV000442182.1; RCV000037914.2	450; 29022
7	140494188	G	A	SNV	Exonic	BRAF	p.R354*	1	0	0.67			Pass; -; -	stop gain
11	108188149	G	A	SNV	Intronic; Exonic	C11orf65; ATM	p.G2083E	1	0		1.09		-; Pass; -	missense	Damaging	Probably Damaging	1060501559	RCV000476869.1
17	45209743	G	T	SNV	Intronic	CDC27		1	0		25.45		-; Pass; -
17	45216239	C	A	SNV	Exonic	CDC27	p.E530*; p.E524*; p.E523*; p.E463*	1	0		1.89		-; Pass; -	stop gain
17	45249379	C	T	SNV	Intronic; Exonic	CDC27	p.G52E	1	0	1.04			Pass; -; -	missense	Damaging	Probably Damaging
5	137802523	C		Deletion	Exonic	EGR1	p.I131fs*31	1	0	0.43			Pass; -; -	frameshift
4	1808916	C	G	SNV	Exonic	FGFR3	p.S671*; p.S783*; p.S785*	1	0		1.48		-; Pass; -	stop gain
20	57470675	G	A	SNV	Exonic; ncRNA; 5'UTR; 3'UTR	GNAS	p.E693K; p.E50K	1	0		2.1		-; Pass; -	missense	Damaging	Possibly Damaging
6	405048	C	G	SNV	ncRNA; Exonic	IRF4	p.S376C; p.S377C	1	0		0.35		-; Pass; -	missense	Damaging	Possibly Damaging
12	25398285	C	T	SNV	Exonic	KRAS	p.G12S	1	0		34.14		-; Pass; -	missense	Damaging	Possibly Damaging	121913530	RCV000432392.1; RCV000013414.5; RCV000144971.3; RCV000038264.3; RCV000445081.1; RCV000119790.1	25880; 517; 1152506
17	7578188	C	T	SNV	Exonic	TP53	p.E89K; p.E182K; p.E221K; p.E62K	1	0		1.78		-; Pass; -	missense	Damaging	Possibly Damaging	786201592	RCV000163935.1	6217441; 6217440; 6217439; 4995784; 4995785; 44853; 6217438; 116688; 116690; 116689
14	103355963		T	Insertion	Intronic; Exonic	TRAF3	p.Q242fs*39	1	0		1.55		-; Pass; -	frameshift
14	103363658	C	T	SNV	Exonic	TRAF3	p.Q294*; p.Q269*; p.Q211*	1	0		1.01		-; Pass; -	stop gain					1477377
14	103363706	C	T	SNV	Exonic	TRAF3	p.R310*; p.R227*; p.R285*	1	0		2.69		-; Pass; -	stop gain					144682
14	103371912	G	T	SNV	Exonic	TRAF3	p.D500Y; p.D417Y; p.D475Y	1	0		5.23		-; Pass; -	missense	Damaging	Probably Damaging
Patient 34	Relapsed
Chromosome	Position	Reference Allele	Sample Allele	Variation Type	Gene Region	Gene Symbol	Protein Variant	Case Samples With Variant	Control Samples With Variant	Q51_S61_R1 - Allele Fraction	BM51_S62_R1 - Allele Fraction	PB51_S63_R1 - Allele Fraction	Sample Upstream Filtering	Translation Impact	SIFT Function Prediction	PolyPhen-2 Function Prediction	dbSNP ID	CLINVAR ID	COSMIC ID
17	45219332	T	G	SNV	Exonic	CDC27	p.N419H; p.N480H; p.N486H; p.N479H	2	0	7.22	1.04		Pass; Pass; -	missense	Damaging	Possibly Damaging	62077261
17	45249379	C	T	SNV	Intronic; Exonic	CDC27	p.G52E	1	0	1.06			Pass; -; -	missense	Damaging	Probably Damaging
4	1806204	C		Deletion	Intronic; Exonic	FGFR3	p.T412fs*22; p.T410fs*22	1	0	0.57			Pass; -; -	frameshift
12	25380275	T	G	SNV	Exonic	KRAS	p.Q61H	1	0		8.29		-; Pass; -	missense	Damaging	Benign	17851045	RCV000154530.3; RCV000444370.1; RCV000424748.1	14201; 554; 1135364
12	25398281	C	T	SNV	Exonic	KRAS	p.G13D	1	0		2.23		-; Pass; -	missense	Damaging	Benign	112445441	RCV000431806.1; RCV000421576.1; RCV000444192.1; RCV000013409.6; RCV000038269.3; RCV000144967.4; RCV000427102.1; RCV000144968.4	18793; 532; 1140132
Patient 35	Relapsed
Chromosome	Position	Reference Allele	Sample Allele	Variation Type	Gene Region	Gene Symbol	Protein Variant	Case Samples With Variant	Control Samples With Variant	Q52_S64_R1 - Allele Fraction	BM52_S65_R1 - Allele Fraction	PB52_S66_R1 - Allele Fraction	Sample Upstream Filtering	Translation Impact	SIFT Function Prediction	PolyPhen-2 Function Prediction	dbSNP ID	CLINVAR ID	COSMIC ID
17	79479108	G	A	SNV	ncRNA; Exonic	ACTG1	p.R62C	1	0		0.27		-; Pass; -	missense	Damaging	Possibly Damaging
11	69462782	C	T	SNV	Exonic	CCND1	p.P199S	1	0	1.71			Pass; -; -	missense	Damaging	Possibly Damaging
12	25380275	T	G	SNV	Exonic	KRAS	p.Q61H	1	0		9.57		-; Pass; -	missense	Damaging	Benign	17851045	RCV000154530.3; RCV000444370.1; RCV000424748.1	14201; 554; 1135364
3	178947821	G	A	SNV	Exonic	PIK3CA	p.R899H	1	0	1.09			Pass; -; -	missense	Tolerated	Benign
Patient 36	Relapsed
Chromosome	Position	Reference Allele	Sample Allele	Variation Type	Gene Region	Gene Symbol	Protein Variant	Case Samples With Variant	Control Samples With Variant	Q53_S67_R1 - Allele Fraction	BM53_S68_R1 - Allele Fraction	PB53_S69_R1 - Allele Fraction	Sample Upstream Filtering	Translation Impact	SIFT Function Prediction	PolyPhen-2 Function Prediction	dbSNP ID	CLINVAR ID	COSMIC ID
17	79479108	G	A	SNV	ncRNA; Exonic	ACTG1	p.R62C	2	0	0.5	0.33		Pass; Pass; -	missense	Damaging	Possibly Damaging
17	79479009	G	A	SNV	ncRNA; Exonic	ACTG1	p.R95C	1	0	0.8			Pass; -; -	missense	Damaging	Possibly Damaging			4817410
3	142176504	G	A	SNV	Exonic	ATR	p.R2533*	1	0		0.26		-; Pass; -	stop gain					35421
17	45219332	T	G	SNV	Exonic	CDC27	p.N419H; p.N480H; p.N486H; p.N479H	2	0	6.98	1.12		Pass; Pass; -	missense	Damaging	Possibly Damaging	62077261
17	45234491	C	A	SNV	Splice Site	CDC27		1	0		1.79		-; Pass; -
17	45249379	C	T	SNV	Intronic; Exonic	CDC27	p.G52E	1	0	0.6			Pass; -; -	missense	Damaging	Probably Damaging
12	25380275	T	G	SNV	Exonic	KRAS	p.Q61H	1	0		1.18		-; Pass; -	missense	Damaging	Benign	17851045	RCV000154530.3; RCV000444370.1; RCV000424748.1	14201; 554; 1135364
